# Supplementary material for: Cocrystallization-driven stabilization of metastable nanoclusters: a case study of Pd1Au9
Source: Royal Society of Chemistry journal article supplement (doi:10.1039/d1nr00721a), 2021-01-01
Supplement: d1nr00721a1.pdf [file d1nr00721a1.pdf]

**Supporting Information:**

**Cocrystallization-Driven Stabilization of Metastable Nanoclusters: A  
Case Study of Pd<sub>1</sub>Au<sub>9</sub>**

Honglei Shen,<sup>a,b,§</sup> Xiao Wei,<sup>a,b,§</sup> Chao Xu,<sup>a,b</sup> Shuxin Wang,<sup>c</sup> Shan Jin,<sup>a,b</sup> Xi Kang,<sup>a,b,\*</sup> Manzhou  
Zhu<sup>a,b,\*</sup>

<sup>a</sup>Department of Chemistry and Centre for Atomic Engineering of Advanced Materials, Anhui Province Key Laboratory of Chemistry for Inorganic/Organic Hybrid Functionalized Materials, Anhui University, Hefei 230601, P. R. China.

<sup>b</sup>Key Laboratory of Structure and Functional Regulation of Hybrid Materials, Anhui University, Ministry of Education, Hefei 230601, P. R. China.

<sup>c</sup>College of Materials Science and Engineering, Qingdao University of Science and Technology, Qingdao 266042, P. R. China.

<sup>§</sup>H.S. and X.W. contributed equally.

\*E-mails of corresponding authors: kangxi\_chem@ahu.edu.cn (X.K.); zmz@ahu.edu.cn (M.Z.).

Notes: The authors declare no competing financial interest.

*This Supporting Information includes:*

Figs. S1-S7

Tables S1-S6

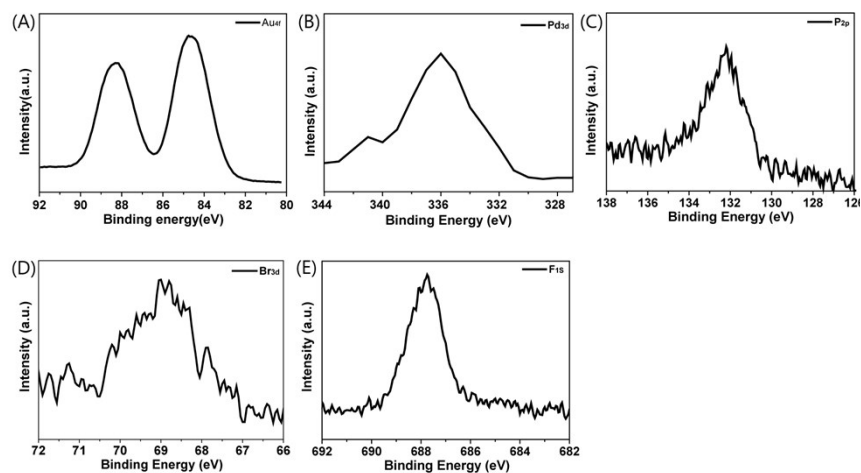

**Fig. S1** XPS spectra of (A) Au4f, (B) Pd3d, (C) P2p, (D) Br3d, and (E) F1s of the [Pd<sub>1</sub>Au<sub>9</sub>(TFPP)<sub>7</sub>Br<sub>2</sub>]<sup>+</sup> nanocluster.

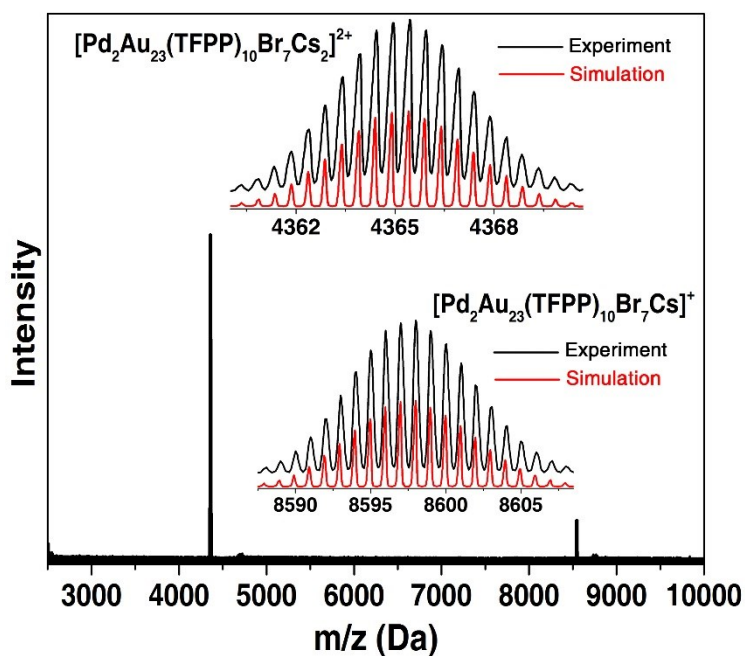

**Fig. S2** ESI-MS result of the Pd<sub>2</sub>Au<sub>23</sub>(TFPP)<sub>10</sub>Br<sub>7</sub> nanocluster. The experimental mass peaks excellently match the simulated isotope patterns. Insets: comparison of experiment (black trace) and simulated (red) isotopic distributions. Cs<sup>+</sup> ions (CH<sub>3</sub>COOCs) are introduced in the mass detection, and the detected signals are assigned to [Pd<sub>2</sub>Au<sub>23</sub>(TFPP)<sub>10</sub>Br<sub>7</sub>-Cs<sub>1</sub>]<sup>+</sup> and [Pd<sub>2</sub>Au<sub>23</sub>(TFPP)<sub>10</sub>Br<sub>7</sub>-Cs<sub>2</sub>]<sup>2+</sup>, respectively.

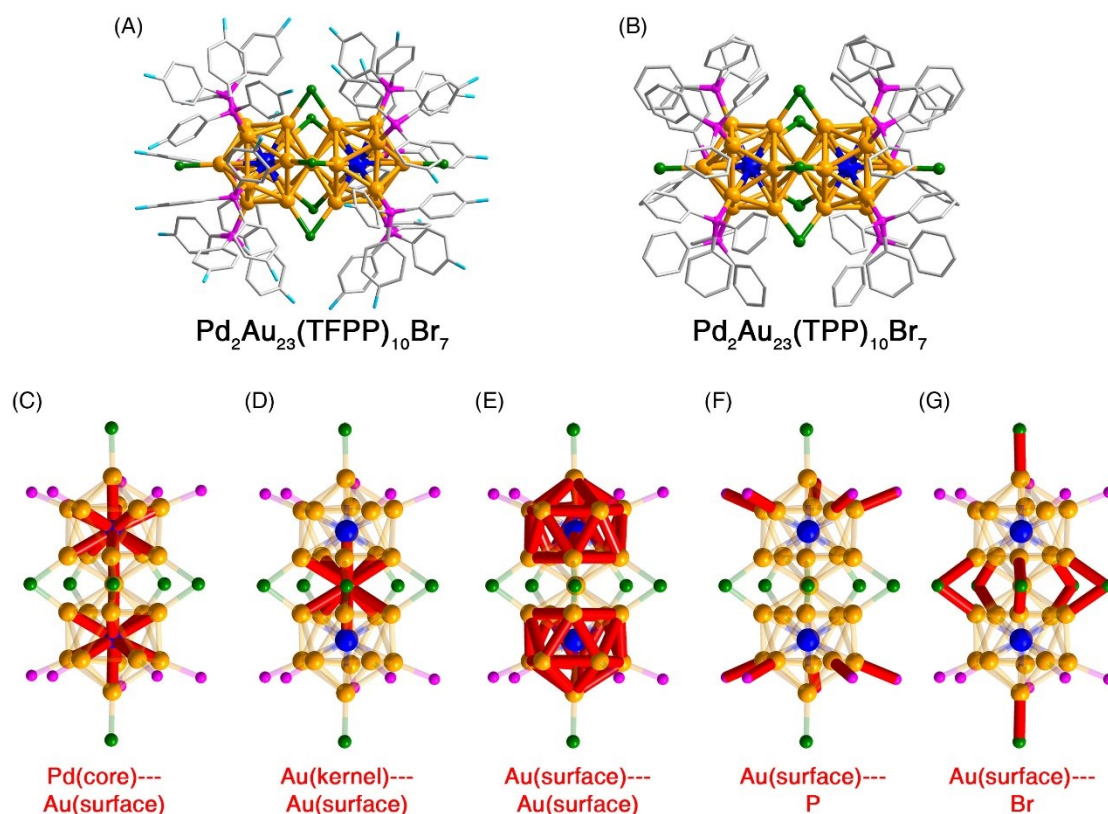

**Fig. S3** Comparison of corresponding bond lengths between  $\text{Pd}_2\text{Au}_{23}(\text{TPP})_{10}\text{Br}_7$  and  $\text{Pd}_2\text{Au}_{23}(\text{TFPP})_{10}\text{Br}_7$ . The only difference between  $\text{Pd}_2\text{Au}_{23}(\text{TFPP})_{10}\text{Br}_7$  and  $\text{Pd}_2\text{Au}_{23}(\text{TPP})_{10}\text{Br}_7$  are their phosphine ligands (Figure S2A,B). Figure S2C-G depicts the compared bond lengths in  $\text{Pd}_2\text{Au}_{23}$  nanoclusters. The comparisons of bond length between two  $\text{Pd}_2\text{Au}_{23}$  nanoclusters are shown in Table S1. Specifically, compared with  $\text{Pd}_2\text{Au}_{23}(\text{TFPP})_{10}\text{Br}_7$ , the average Pd---Au bond length of  $\text{Pd}_2\text{Au}_{23}(\text{TPP})_{10}\text{Br}_7$  is reduced by 0.36%, and the average bond length of kernel Au---surface Au is reduced by 0.18%. On the contrary, the average Au---Br bond length of  $\text{Pd}_2\text{Au}_{23}(\text{TFPP})_{10}\text{Br}_7$  is much longer than that  $\text{Pd}_2\text{Au}_{23}(\text{TPP})_{10}\text{Br}_7$ .

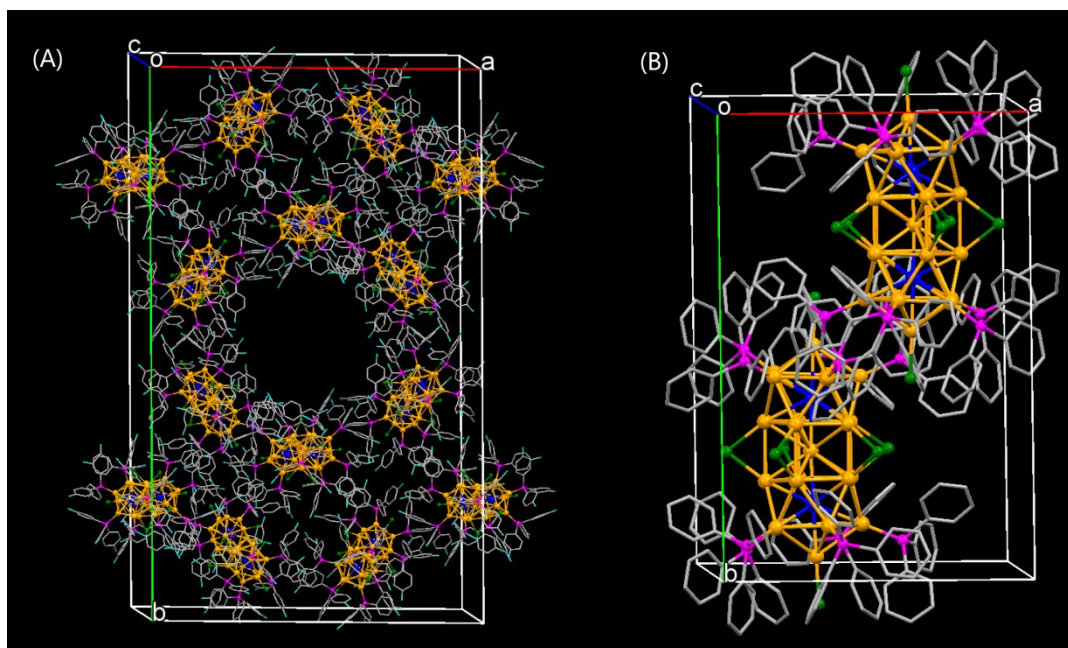

**Fig. S4** Comparison of crystalline packing modes of (A)  $\text{Pd}_2\text{Au}_{23}(\text{TFPP})_{10}\text{Br}_7$  and (B)  $\text{Pd}_2\text{Au}_{23}(\text{TPP})_{10}\text{Br}_7$ . The crystalline packing modes of these two  $\text{Pd}_2\text{Au}_{23}$  nanoclusters are different. The unit cell of  $\text{Pd}_2\text{Au}_{23}(\text{TFPP})_{10}\text{Br}_7$  contains more cluster molecules compare to that of  $\text{Pd}_2\text{Au}_{23}(\text{TPP})_{10}\text{Br}_7$ . Color legends: orange, Au; blue, Pd; green, Br; magenta, P; gray, C; light blue, F. For clarity, all H atoms are omitted.

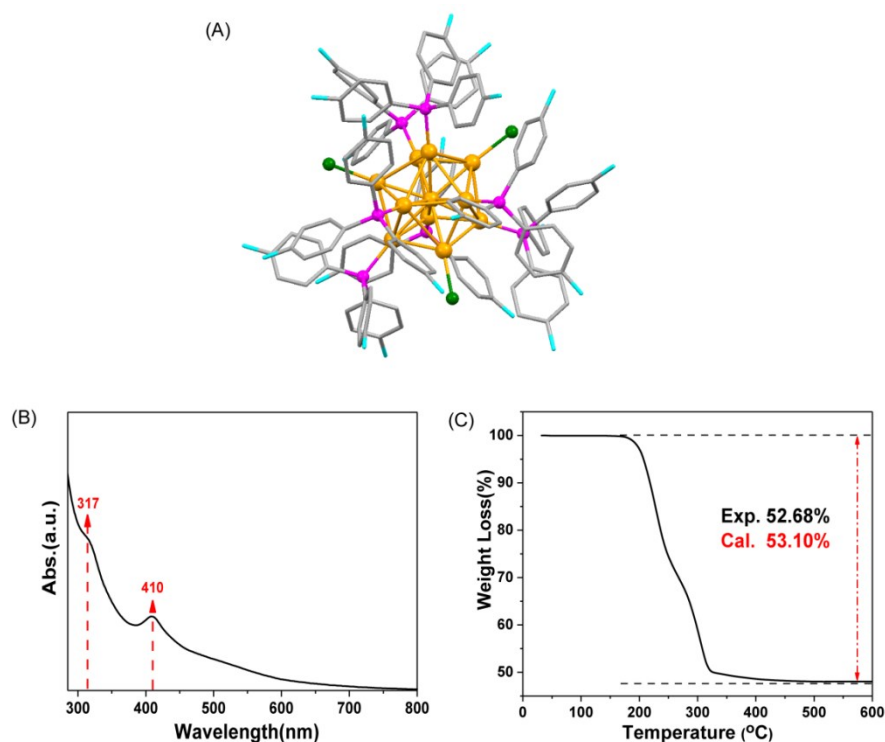

**Fig. S5** Characterizations of  $\text{Au}_{11}(\text{TFPP})_7\text{Br}_3$ . (A) Crystal structure of  $\text{Au}_{11}(\text{TFPP})_7\text{Br}_3$ . (B) UV-vis of  $\text{Au}_{11}(\text{TFPP})_7\text{Br}_3$  (dissolved in  $\text{CH}_2\text{Cl}_2$ ). (C) TGA of  $\text{Au}_{11}(\text{TFPP})_7\text{Br}_3$ .

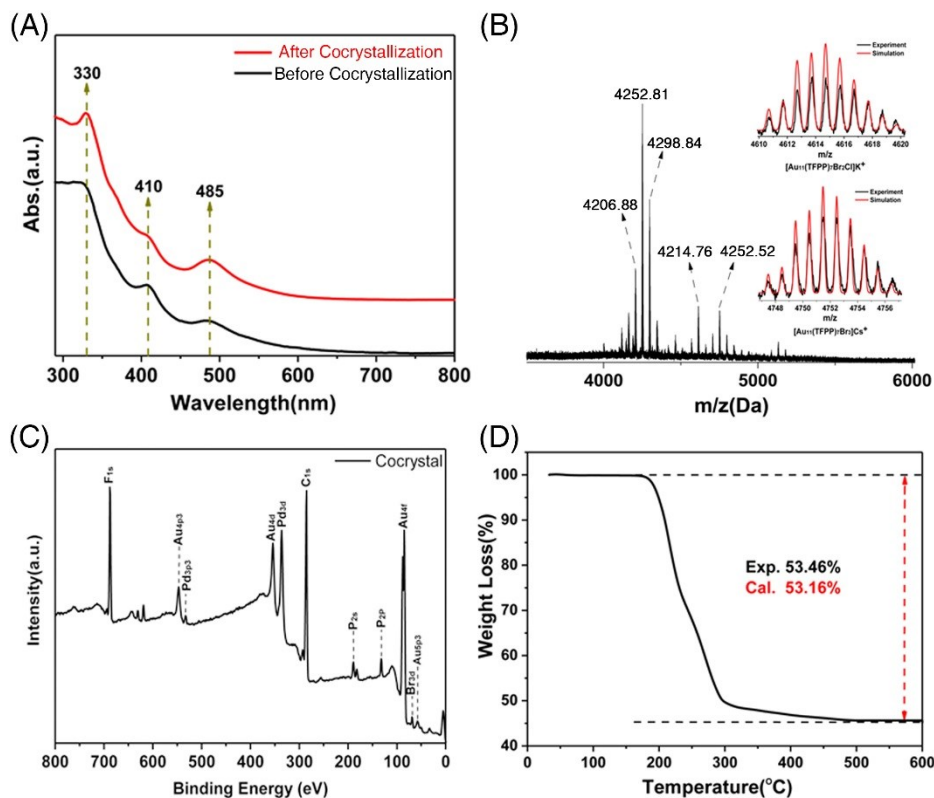

**Fig. S6** Characterizations of the cocrystallized  $\text{Pd}_1\text{Au}_9(\text{TFPP})_6\text{Br}_3@ \text{Au}_{11}(\text{TFPP})_7\text{Br}_3$ . (A) UV-vis. (B) ESI-MS. The peaks at 4206.88, 4252.81, and 4298.84 Da belong to the  $[\text{Pd}_1\text{Au}_9(\text{TFPP})_7\text{Br}_2]^+$  nanocluster, corresponding to Figure 1B. The signals at 4214.76 and 4252.52 Da are assigned to  $[\text{Au}_{11}(\text{TFPP})_7\text{Br}_2\text{Cl}_1]\text{K}^+$  and  $[\text{Au}_{11}(\text{TFPP})_7\text{Br}_3]\text{Cs}^+$ , respectively. (C) XPS. (D) TGA.

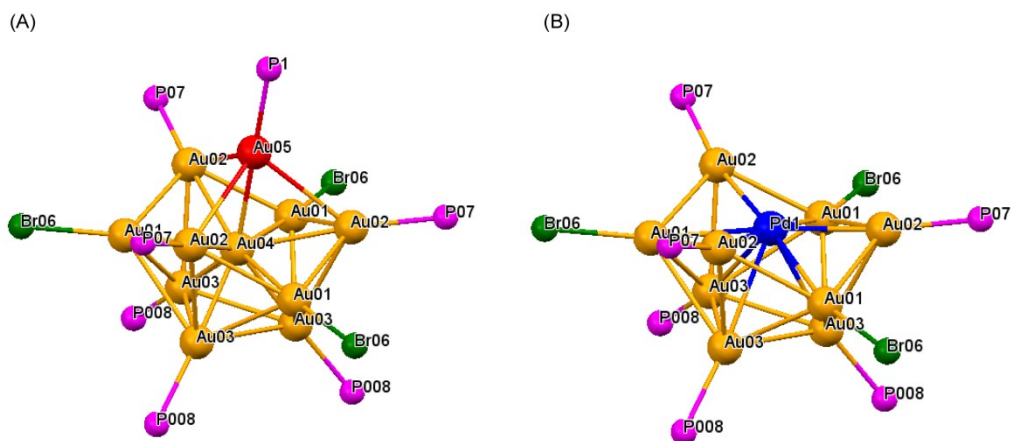

**Fig. S7** Structural comparison between  $\text{Pd}_1\text{Au}_9(\text{TFPP})_6\text{Br}_3$  and  $\text{Au}_{11}(\text{TFPP})_7\text{Br}_3$ . Color legends: orange and red, Au; blue, Pd; green, Br; purple, P. For clarity, all H, C and F atoms are omitted.

**Table S1.** Comparison of corresponding bond lengths between Pd<sub>2</sub>Au<sub>23</sub>(TPP)<sub>10</sub>Br<sub>7</sub> and Pd<sub>2</sub>Au<sub>23</sub>(TFPP)<sub>10</sub>Br<sub>7</sub>. The corresponding bonds are highlights in Figure S2.

| Cluster                                | Pd(core)---<br>Au(surface)        | Au(kernel)---<br>Au(surface)      | Au(surface)---<br>Au(surface)     | Au(surface)-<br>--P               | Au(surface)---<br>Br              |
|----------------------------------------|-----------------------------------|-----------------------------------|-----------------------------------|-----------------------------------|-----------------------------------|
| Pd <sub>2</sub> Au <sub>23</sub> -TPP  | 2.682---<br>2.786Å<br>Avg. 2.730Å | 2.808---<br>2.878Å<br>Avg. 2.844Å | 2.793---<br>2.998Å<br>Avg. 2.880Å | 2.281---<br>2.290Å<br>Avg. 2.280Å | 2.497---<br>2.670Å<br>Avg. 2.607Å |
| Pd <sub>2</sub> Au <sub>23</sub> -TFPP | 2.690---<br>2.786Å<br>Avg. 2.740Å | 2.830---<br>2.870Å<br>Avg. 2.849Å | 2.787---<br>3.111Å<br>Avg. 2.880Å | 2.279---<br>2.293Å<br>Avg. 2.280Å | 2.506---<br>2.583Å<br>Avg. 2.566Å |
| Diff.                                  | -0.36%                            | -0.18%                            | 0%                                | 0%                                | 1.60%                             |

**Table S2.** Comparison of cell parameters between Pd<sub>2</sub>Au<sub>23</sub>(TPP)<sub>10</sub>Br<sub>7</sub> and Pd<sub>2</sub>Au<sub>23</sub>(TFPP)<sub>10</sub>Br<sub>7</sub>. The corresponding cell units are highlights in Figure S3.

| Cluster                                                               | Space group | Volume/Å <sup>3</sup> | Unit cell dimensions                         |                                   | Z |
|-----------------------------------------------------------------------|-------------|-----------------------|----------------------------------------------|-----------------------------------|---|
| Pd <sub>2</sub> Au <sub>23</sub> (TPP) <sub>10</sub> Br <sub>7</sub>  | P 21/m      | 11590                 | a = 46.483 Å<br>b = 77.477 Å<br>c = 19.619 Å | α = 90°<br>β = 102.95°<br>γ = 90° | 2 |
| Pd <sub>2</sub> Au <sub>23</sub> (TFPP) <sub>10</sub> Br <sub>7</sub> | C 2/c       | 67904.4               | a = 46.483 Å<br>b = 77.477 Å<br>c = 19.619 Å | α = 90°<br>β = 106.04°<br>γ = 90° | 4 |

**Table S3.** Comparison of cell parameters between the singly-crystallized Au<sub>11</sub>(TFPP)<sub>7</sub>Br<sub>3</sub> and cocrystallized Pd<sub>1</sub>Au<sub>9</sub>(TFPP)<sub>6</sub>Br<sub>3</sub>@Au<sub>11</sub>(TFPP)<sub>7</sub>Br<sub>3</sub>.

| Cluster                                                                                                                       | Space group | Volume/Å <sup>3</sup> | Unit cell dimensions                         |                                | Z |
|-------------------------------------------------------------------------------------------------------------------------------|-------------|-----------------------|----------------------------------------------|--------------------------------|---|
| Au <sub>11</sub> (TFPP) <sub>7</sub> Br <sub>3</sub>                                                                          | R 3         | 9775.7                | a = 26.031 Å<br>b = 26.031 Å<br>c = 16.659 Å | α = 90°<br>β = 90°<br>γ = 120° | 3 |
| Pd <sub>1</sub> Au <sub>9</sub> (TFPP) <sub>6</sub> Br <sub>3</sub> @<br>Au <sub>11</sub> (TFPP) <sub>7</sub> Br <sub>3</sub> | R 3         | 9623.9                | a = 26.403 Å<br>b = 26.403 Å<br>c = 15.941 Å | α = 90°<br>β = 90°<br>γ = 120° | 3 |

**Table S4.** Crystal data and structure refinement for the Pd<sub>2</sub>Au<sub>23</sub>(TFPP)<sub>10</sub>Br<sub>7</sub>.

|                                         |                                                  |
|-----------------------------------------|--------------------------------------------------|
| Crystal system                          | monoclinic                                       |
| Space group                             | C2/c                                             |
| a/Å                                     | 46.48300                                         |
| b/Å                                     | 77.47700                                         |
| c/Å                                     | 19.61900                                         |
| $\alpha$ /°                             | 90                                               |
| $\beta$ /°                              | 104.0600                                         |
| $\gamma$ /°                             | 90                                               |
| Volume/Å <sup>3</sup>                   | 67904                                            |
| Z                                       | 4                                                |
| Pcalc(g/cm <sup>3</sup> )               | 2.482                                            |
| $\mu$ /mm <sup>-1</sup>                 | 31.130                                           |
| F(000)                                  | 45252.0                                          |
| Radiation                               | CuK $\alpha$ (1.54186)                           |
| Index ranges                            | -55 <= h <= 55, -29 <= k <= 90, -22 <= l <= 23   |
| Final R indexes [ $I \geq 2\sigma(I)$ ] | R <sub>1</sub> = 0.0670 wR <sub>2</sub> = 0.1776 |
| Final R indexes [all data]              | R <sub>1</sub> = 0.0893 wR <sub>2</sub> = 0.1928 |

**Table S5.** Crystal data and structure refinement for the  $\text{Au}_{11}(\text{TFFP})_7\text{Br}_3$ .

|                                         |                                                |
|-----------------------------------------|------------------------------------------------|
| Crystal system                          | trigonal                                       |
| Space group                             | R 3                                            |
| a/Å                                     | 26.03100                                       |
| b/Å                                     | 26.03100                                       |
| c/Å                                     | 16.65900                                       |
| $\alpha/^\circ$                         | 90                                             |
| $\beta/^\circ$                          | 90                                             |
| $\gamma/^\circ$                         | 120                                            |
| Volume/Å <sup>3</sup>                   | 9776                                           |
| Z                                       | 3                                              |
| Pcalc(g/cm <sup>3</sup> )               | 2.354                                          |
| $\mu/\text{mm}^{-1}$                    | 25.174                                         |
| F(000)                                  | 6324.0                                         |
| Radiation                               | CuK $\alpha$ (1.54186)                         |
| Index ranges                            | -28 <= h <= 31, -31 <= k <= 27, -10 <= l <= 20 |
| Final R indexes [ $I \geq 2\sigma(I)$ ] | $R_1 = 0.0346$ $wR_2 = 0.0856$                 |
| Final R indexes [all data]              | $R_1 = 0.0376$ $wR_2 = 0.0866$                 |



**Table S6.** Crystal data and structure refinement for the cocrystallized Pd<sub>1</sub>Au<sub>9</sub>(TFPP)<sub>6</sub>Br<sub>3</sub>@Au<sub>11</sub>(TFPP)<sub>7</sub>Br<sub>3</sub>.

|                                         |                                                  |
|-----------------------------------------|--------------------------------------------------|
| Crystal system                          | trigonal                                         |
| Space group                             | R 3                                              |
| a/Å                                     | 26.40300                                         |
| b/Å                                     | 26.40300                                         |
| c/Å                                     | 15.94100                                         |
| $\alpha$ /°                             | 90                                               |
| $\beta$ /°                              | 90                                               |
| $\gamma$ /°                             | 120                                              |
| Volume/Å <sup>3</sup>                   | 9624                                             |
| Z                                       | 3                                                |
| Pcalc(g/cm <sup>3</sup> )               | 2.063                                            |
| $\mu$ /mm <sup>-1</sup>                 | 22.859                                           |
| F(000)                                  | 2331.0                                           |
| Radiation                               | CuK $\alpha$ (1.54186)                           |
| Index ranges                            | -23 <= h <= 30, -29 <= k <= 10, -18 <= l <= 17   |
| Final R indexes [ $I \geq 2\sigma(I)$ ] | R <sub>1</sub> = 0.1121 wR <sub>2</sub> = 0.2755 |
| Final R indexes [all data]              | R <sub>1</sub> = 0.1134 wR <sub>2</sub> = 0.2784 |
